# Supplementary material
Source: ML conference proceedings conference paper supplement (https://openaccess.thecvf.com/content/WACV2022/html/Boyd_Human-Aided_Saliency_Maps_WACV_2022_paper.html)
Supplement: Supplementary file 1 [file Boyd_Human-Aided_Saliency_Maps_WACV_2022_supplemental.zip]

# Supplementary Material: Human-Aided Saliency Maps Improve Generalization of Deep Learning

Aidan Boyd, Kevin Bowyer, Adam Czajka  
University of Notre Dame  
Notre Dame, IN 46556  
{aboyd3, kwb, aczajka}@nd.edu

## A. Detailed Dataset Description

Table 1: Full dataset used for **training and validation** broken down by individual contributing dataset. The in-house currently unpublished data used in this work is denoted as *University of Notre Dame data*.

| Image Type                             | Contributing Dataset                 | # of Samples | Total Samples  |
|----------------------------------------|--------------------------------------|--------------|----------------|
| <b>Bona fide</b>                       | ATVS-FLr [2]                         | 800          | <b>399,053</b> |
|                                        | BERC_IRIS_FAKE [6]                   | 2,776        |                |
|                                        | CASIA-Iris-Thousand [1]              | 19,952       |                |
|                                        | CASIA-Iris-Twins [1]                 | 3,181        |                |
|                                        | Disease-Iris v2.1 [7]                | 255          |                |
|                                        | ETPAD v2 [5]                         | 400          |                |
|                                        | IIITD Contact Lens Iris [3]          | 13           |                |
|                                        | IIITD Combined Spoofing Database [4] | 4,531        |                |
|                                        | LivDet-Iris Clarkson 2015 [11]       | 813          |                |
|                                        | LivDet-Iris Warsaw 2015 [11]         | 36           |                |
|                                        | LivDet-Iris Clarkson 2017 [10]       | 3,949        |                |
|                                        | LivDet-Iris IIITD-WVU 2017 [10]      | 2,944        |                |
| <b>Textured contact lens</b>           | LivDet-Iris Warsaw 2017 [10]         | 5,167        | <b>27,372</b>  |
|                                        | University of Notre Dame data        | 354,236      |                |
|                                        | BERC_IRIS_FAKE [6]                   | 140          |                |
|                                        | IIITD Contact Lens Iris [3]          | 3,420        |                |
|                                        | LivDet-Iris Clarkson 2015 [11]       | 1,107        |                |
|                                        | LivDet-Iris Clarkson 2017 [10]       | 1,881        |                |
| <b>Paper printouts</b>                 | LivDet-Iris IIITD-WVU 2017 [10]      | 1,700        | <b>16,393</b>  |
|                                        | University of Notre Dame data        | 19,124       |                |
|                                        | ATVS-FLr [2]                         | 800          |                |
|                                        | BERC_IRIS_FAKE [6]                   | 1,600        |                |
|                                        | IIITD Combined Spoofing Database [4] | 1,371        |                |
|                                        | LivDet-Iris Clarkson 2015 [11]       | 1,745        |                |
|                                        | LivDet-Iris Warsaw 2015 [11]         | 20           |                |
|                                        | LivDet-Iris Clarkson 2017 [10]       | 2,250        |                |
| <b>Post-mortem Irises</b>              | LivDet-Iris IIITD-WVU 2017 [10]      | 1,766        | <b>2,259</b>   |
|                                        | LivDet-Iris Warsaw 2017 [10]         | 6,841        |                |
| <b>Post-mortem Irises</b>              | Post-Mortem-Iris v3.0 [8]            | 2,259        | <b>2,259</b>   |
| <b>Synthetic</b>                       | CASIA-Iris-Syn V4 [9]                | 10,000       | <b>10,000</b>  |
| <b>Artificial</b>                      | BERC_IRIS_FAKE [6]                   | 80           | <b>277</b>     |
|                                        | University of Notre Dame data        | 197          |                |
| <b>Diseased irises</b>                 | Disease-Iris v2.1 [7]                | 1,537        | <b>1,537</b>   |
| <b>Textured contacts &amp; printed</b> | LivDet-Iris IIITD-WVU 2017 [10]      | 1,899        | <b>1,899</b>   |

## B. Annotation Tool

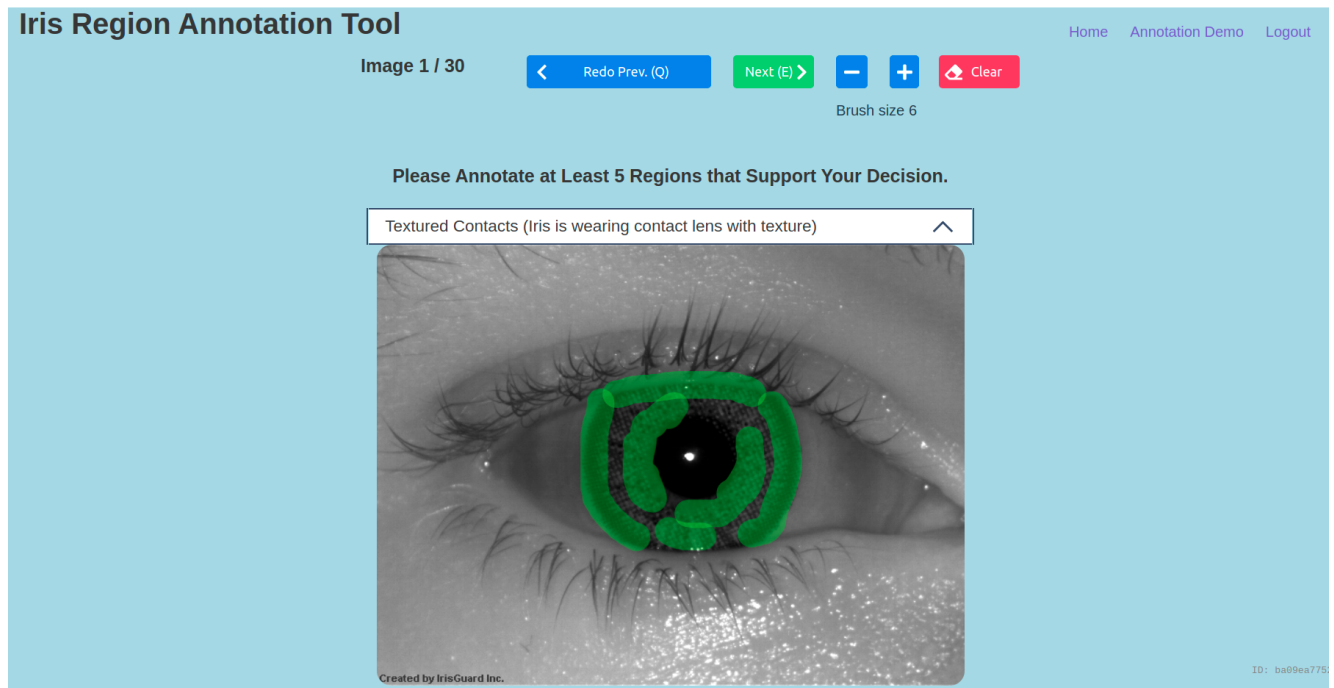

Figure 1: Online annotation tool developed to collect annotation data with an example input of a human solving the iris presentation attack detection task for a textured contact lens sample.

## References

- [1] Chinese academy of sciences institute of automation. <http://www.cbsr.ia.ac.cn/china/Iris%20Databases%20CH.asp>. Accessed: 03-12-2021. **1**
- [2] Javier Galbally, Jaime Ortiz-Lopez, Julian Fierrez, and Javier Ortega-Garcia. Iris liveness detection based on quality related features. In *2012 5th IAPR Int. Conf. on Biometrics (ICB)*, pages 271–276, New Delhi, India, March 2012. IEEE. **1**
- [3] Naman Kohli, Daksha Yadav, Mayank Vatsa, and Richa Singh. Revisiting iris recognition with color cosmetic contact lenses. In *IEEE Int. Conf. on Biometrics (ICB)*, pages 1–7, Madrid, Spain, June 2013. IEEE. **1**
- [4] Naman Kohli, Daksha Yadav, Mayank Vatsa, Richa Singh, and Afzel Noore. Detecting medley of iris spoofing attacks using desist. In *IEEE Int. Conf. on Biometrics: Theory Applications and Systems (BTAS)*, pages 1–6, Niagara Falls, NY, USA, Sept 2016. IEEE. **1**
- [5] Oleg Komogortsev. Eye Tracker Print-Attack Database (ETPAD) v2, 2014. **1**
- [6] Sung Joo Lee, Kang Ryoung Park, Youn Joo Lee, Kwanghyuk Bae, and Jai Hie Kim. Multifeature-based fake iris detection method. *Optical Engineering*, 46(12):1 – 10, 2007. **1**
- [7] M. Trokielewicz, A. Czajka, and P. Maciejewicz. Assessment of iris recognition reliability for eyes affected by ocular pathologies. In *IEEE Int. Conf. on Biometrics: Theory Applications and Systems (BTAS)*, pages 1–6, 2015. **1**
- [8] Mateusz Trokielewicz, Adam Czajka, and Piotr Maciejewicz. Post-mortem iris recognition with deep-learning-based image segmentation. *Image and Vision Computing*, 94:103866, 2020. **1**
- [9] Zhuoshi Wei, Tieniu Tan, and Zhenan Sun. Synthesis of large realistic iris databases using patch-based sampling. In *Int. Conf. on Pattern Recognition (ICPR)*, pages 1–4, Tampa, FL, USA, Dec 2008. IEEE. **1**
- [10] David Yambay, Benedict Becker, Naman Kohli, Daksha Yadav, Adam Czajka, Kevin W. Bowyer, Stephanie Schuckers, Richa Singh, Mayank Vatsa, Afzel Noore, Diego Gragnaniello, C. Sansone, L. Verdoliva, Lingxiao He, Yiwei Ru, Haiqing Li, Nianfeng Liu, Zhenan Sun, and Tieniu Tan. LivDet Iris 2017 – Iris Liveness Detection Competition 2017. In *IEEE Int. Joint Conf. on Biometrics (IJCB)*, pages 1–6, Denver, CO, USA, 2017. IEEE. **1**
- [11] David Yambay, Brian Walczak, Stephanie Schuckers, and Adam Czajka. LivDet-Iris 2015 - Iris Liveness Detection Competition 2015. In *IEEE Int. Conf. on Identity, Security and Behavior Analysis (ISBA)*, pages 1–6, New Delhi, India, Feb 2017. IEEE. **1**
